# Supplementary material
Source: Preprints.org preprint supplement (doi:10.20944/preprints201908.0168.v1)
Supplement: Supplementary file 1 [file supplementary]

Table S1. *Trigonella foenum* L. population sites include name, longitude, and latitude for 50 regions

| Region      | Longitude | Latitude  | Region          | Longitude | Latitude  |
|-------------|-----------|-----------|-----------------|-----------|-----------|
| Mahnian     | 49.085535 | 35.52108  | Azna            | 48.680525 | 33.488492 |
| Kakareza    | 48.261338 | 33.720642 | saveh           | 50.331931 | 35.037995 |
| Kuhdasht    | 47.681523 | 33.563479 | sabzevar        | 57.65865  | 36.224587 |
| Khomein     | 50.317967 | 33.663119 | parand          | 50.987826 | 35.478324 |
| mardabad    | 50.537596 | 35.693079 | chitgar         | 51.212207 | 35.729605 |
| bandarabbas | 56.285105 | 27.214064 | Geshlagh        | 36.01861  | 50.419564 |
| Hamadan     | 48.527574 | 34.835419 | Boyinzahra      | 35.753171 | 50.058024 |
| SagzAbad    | 49.934878 | 35.766543 | birjand         | 59.254591 | 32.862695 |
| Bishe       | 48.687335 | 33.444838 | ghadim abad     | 49.968588 | 36.218293 |
| Alashtar    | 48.268144 | 33.916449 | mahalat         | 50.461191 | 33.91693  |
| Borujerd    | 48.813873 | 33.805145 | Gayene          | 59.169619 | 33.565837 |
| Shiraz      | 52.233507 | 29.62115  | shushtar        | 48.832836 | 32.121287 |
| Khorramabad | 47.996006 | 33.510018 | Eslamshahr      | 51.246368 | 35.535401 |
| Kazerun     | 51.944223 | 29.568908 | aligudarz       | 49.699415 | 33.387433 |
| haji-abad   | 56.363404 | 27.25745  | BajiAbad        | 48.630759 | 31.476271 |
| Minab       | 56.542827 | 27.323446 | Hamidieh        | 48.516364 | 31.435083 |
| Fasa        | 53.450804 | 29.137368 | MazarSaghi      | 59.321318 | 33.145016 |
| Gazvin      | 49.759621 | 36.340488 | masjed soleiman | 49.188288 | 32.053383 |
| Joghtay     | 57.058914 | 36.618904 | Takestan        | 36.078885 | 49.714336 |
| salafchegan | 50.472353 | 34.493022 | Mirash          | 50.731482 | 36.182436 |
| Kalateh     | 47.047711 | 33.760414 | Darvan          | 51.036232 | 36.006212 |
| Vardij      | 51.173727 | 35.810671 | malayer         | 48.789939 | 34.294051 |
| Ferdows     | 58.254167 | 34.311944 | shazand         | 49.400067 | 33.949173 |
| Kashmar     | 58.485833 | 35.464167 | Nazarabad       | 35.970873 | 50.621609 |
| Varish      | 51.173651 | 35.829366 | dizan           | 50.955418 | 36.224762 |

Table S2. Equation of calibration curve and R<sup>2</sup> value of measured primary and secondary metabolites by HPLC and spectrophotometer except for antioxidant activity

| metabolites          | equation             | R <sup>2</sup> value  |
|----------------------|----------------------|-----------------------|
| aspartic acid        | y = 4717.4X - 119157 | R <sup>2</sup> = 0.99 |
| glutamic             | y = 1581X - 124      | R <sup>2</sup> = 0.99 |
| isoleucine           | y = 2744x - 2727.9   | R <sup>2</sup> = 0.99 |
| leucin               | y = 1087.3X - 1851.2 | R <sup>2</sup> = 0.99 |
| phenylalanine        | y = 1777.1X + 9045   | R <sup>2</sup> = 0.99 |
| valine               | y = 4998.2X + 2344   | R <sup>2</sup> = 0.99 |
| lysin                | y = 12375X - 1057    | R <sup>2</sup> = 0.99 |
| 4-hydroxy isoleucine | y = 4108X - 291.2    | R <sup>2</sup> = 0.99 |
| Trigonelline         | y = 455.25X - 200.81 | R <sup>2</sup> = 0.99 |
| Phenol               | y = 0.009X - 0.029   | R <sup>2</sup> = 0.99 |
| Flavonoid            | y = 0.008X - 0.002   | R <sup>2</sup> = 0.99 |

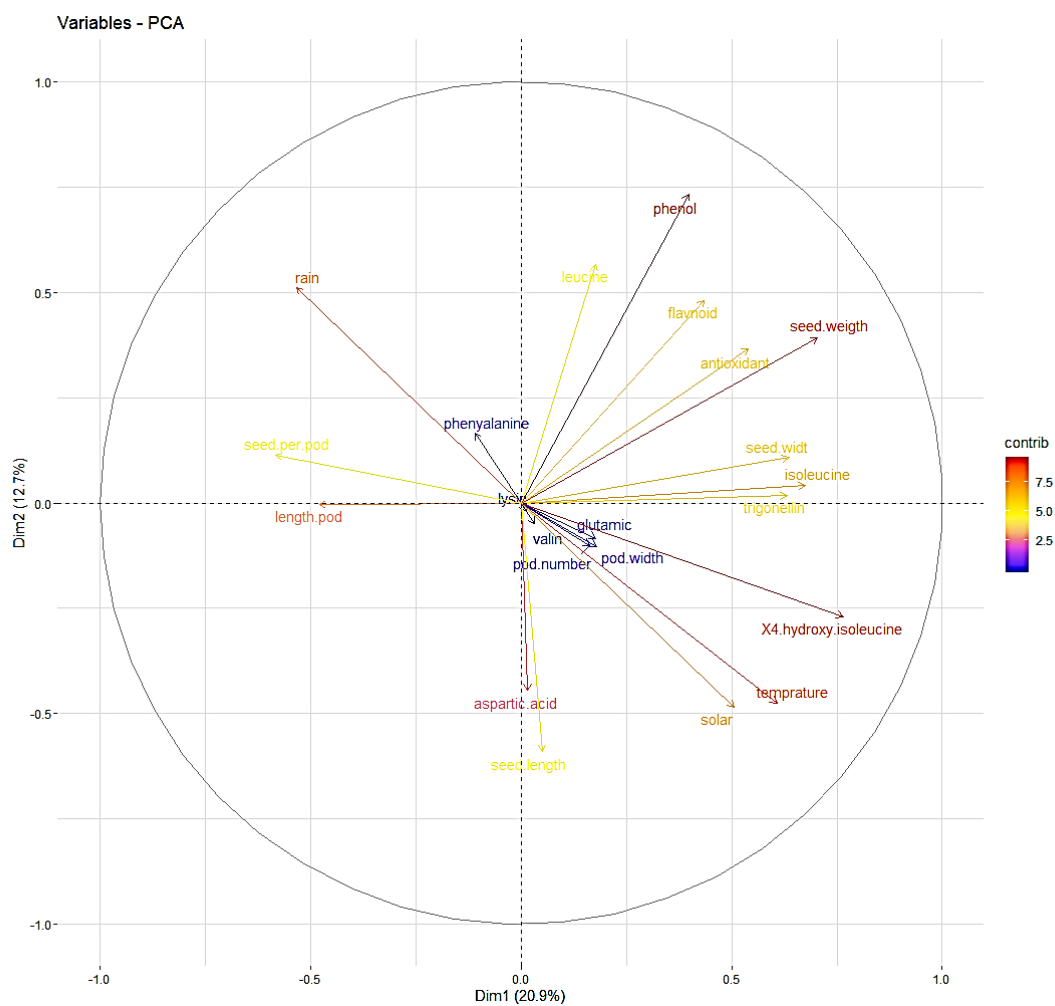

Figure S1. The association amongst measured variables and two first axis of PCA result. First and second dims explained 20.9% and 12.7% of the total variance, respectively. The color of vectors shows the rate of contribution of each variable to each dim.

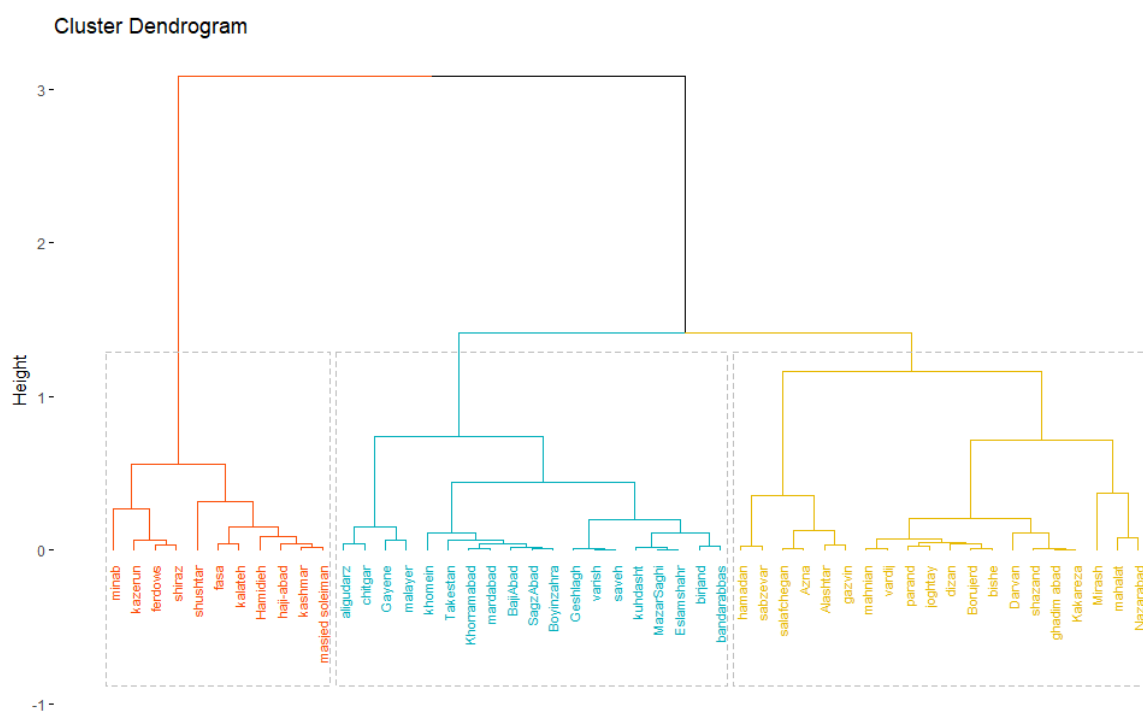

Figure S2. Dendrogram created by the hierarchical clustering based on HCPC result for studied regions.

Table S3. The eigenvalue, constrained inertia and cumulative percent of first two CCA

|                         | Two first important axes |       |
|-------------------------|--------------------------|-------|
|                         | CCA1                     | CCA2  |
| Eigenvalue              | 0.023                    | 0.001 |
| Constrained inertia (%) | 0.87                     | 0.07  |
| Cumulative %            | 0.87                     | 0.94  |

Table S4. The principal coordination of canonical variables with two first axis of CCA analysis.

Highest value and the lowest value displayed in green and red colors respectively in CCA1 and CCA2

|                      | CCA1   | CCA2   |
|----------------------|--------|--------|
| trigonelline         | -0.110 | 0.083  |
| 4-hydroxy isoleucine | -0.335 | 0.024  |
| Aspartic acid        | -0.130 | -0.051 |
| Glutamic             | -0.046 | -0.110 |
| valine               | -0.035 | -0.070 |
| phenylalanine        | 0.138  | -0.100 |
| isoleucine           | -0.225 | 0.116  |
| leucine              | 0.392  | 0.349  |
| antioxidant          | -0.149 | -0.135 |
| flavonoid            | 0.012  | -0.002 |
| phenol               | 0.096  | -0.014 |
| Lysin                | 0.067  | 0.067  |
| Pod number           | 0.061  | -0.042 |
| Seed per pod         | 0.319  | 0.020  |
| Pod length           | 0.195  | -0.014 |
| Seed weight          | 0.047  | 0.070  |
| Pod width            | 0.073  | -0.019 |
| Seed length          | 0.079  | 0.008  |
| Seed width           | 0.025  | 0.017  |
| Solar irradiation    | -0.817 | 0.267  |
| Temperature          | -0.751 | 0.451  |
| Rain                 | 0.981  | 0.170  |

Table S5. Principal coordinates of regions to each axis by all vegetal traits with CCA1 and CCA2.  
Highest value and the lowest value displayed in green and red colors respectively CCA1 and CCA2

|          | CCA1   | CCA2   |
|----------|--------|--------|
| Shushtar | -1.332 | -0.191 |
| Hamidieh | -0.731 | -1.429 |
| Kazerun  | -0.423 | 3.102  |

|                 |        |        |
|-----------------|--------|--------|
| haji-abad       | -0.715 | 0.157  |
| Minab           | -0.520 | 3.178  |
| Fasa            | -0.504 | -1.013 |
| Kalateh         | -0.968 | 1.313  |
| shiraz          | -0.656 | -1.014 |
| Mirash          | 2.906  | 3.833  |
| Hamadan         | -0.053 | -3.040 |
| Khomein         | 1.778  | -1.449 |
| Khorramabad     | 2.061  | -2.721 |
| Mardabad        | 0.636  | -2.062 |
| Ferdows         | -0.775 | 0.850  |
| Sagz Abad       | 0.942  | -1.465 |
| Boyinzahra      | 1.760  | -2.616 |
| Masjed soleiman | -1.177 | 0.369  |

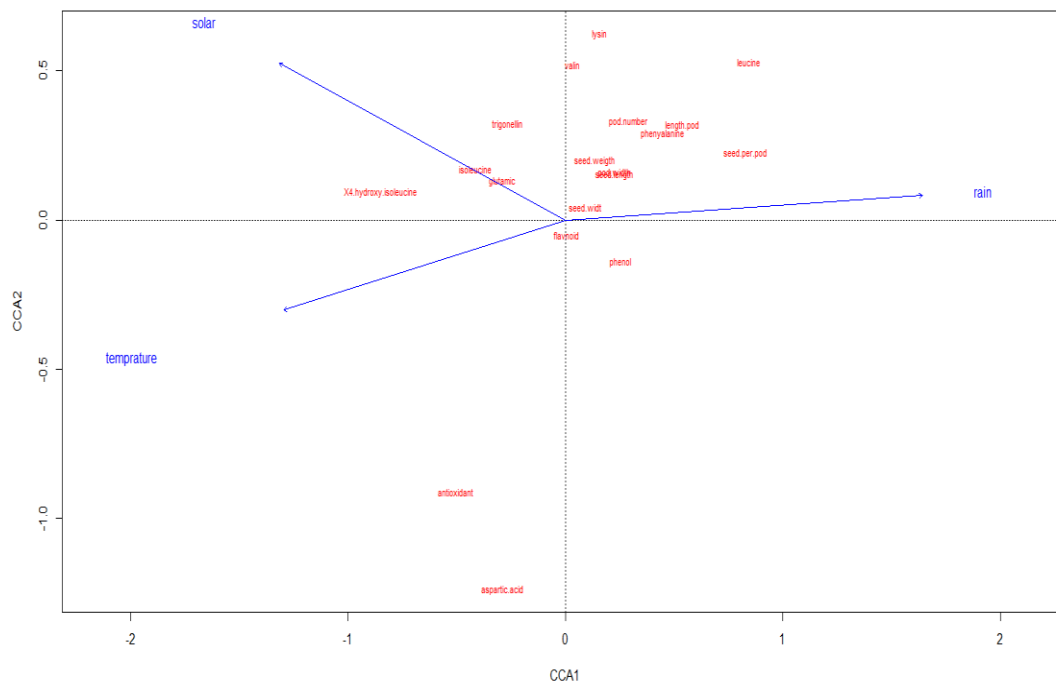

Figure S3. CCA plot of the relationship between environmental and vegetal variables. Blue arrows showed environmental variables and green text displayed vegetal traits

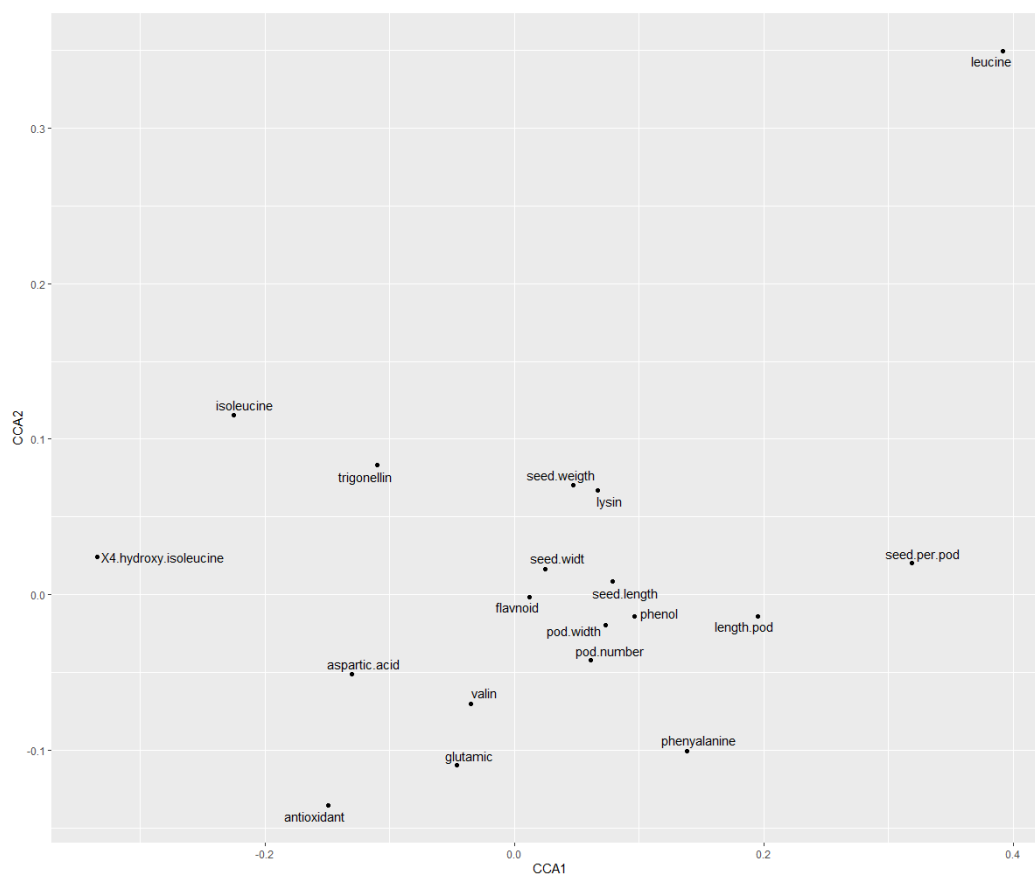

Figure S4. Scatter plot of CCA that shows the coordinates of variables to each dimension

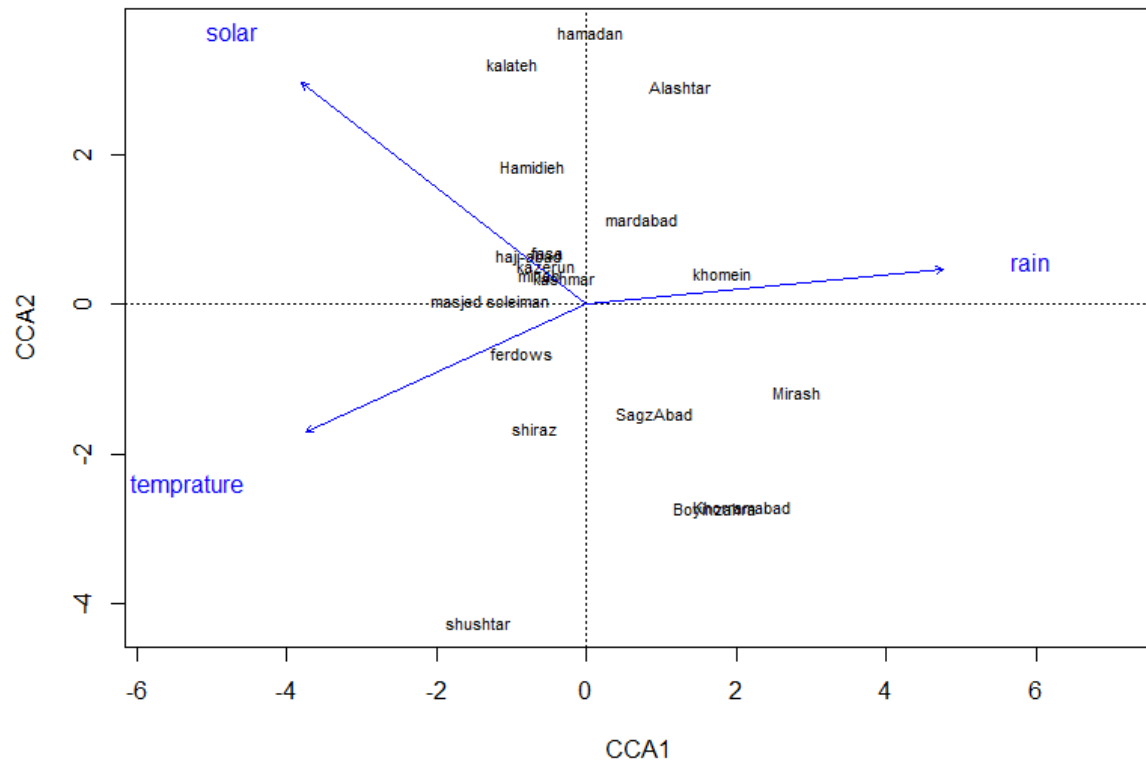

Figure S5. CCA ordination biplot of selected regions based on HCPC analysis, displaying environmental variables in blue arrows and each region in the black text.

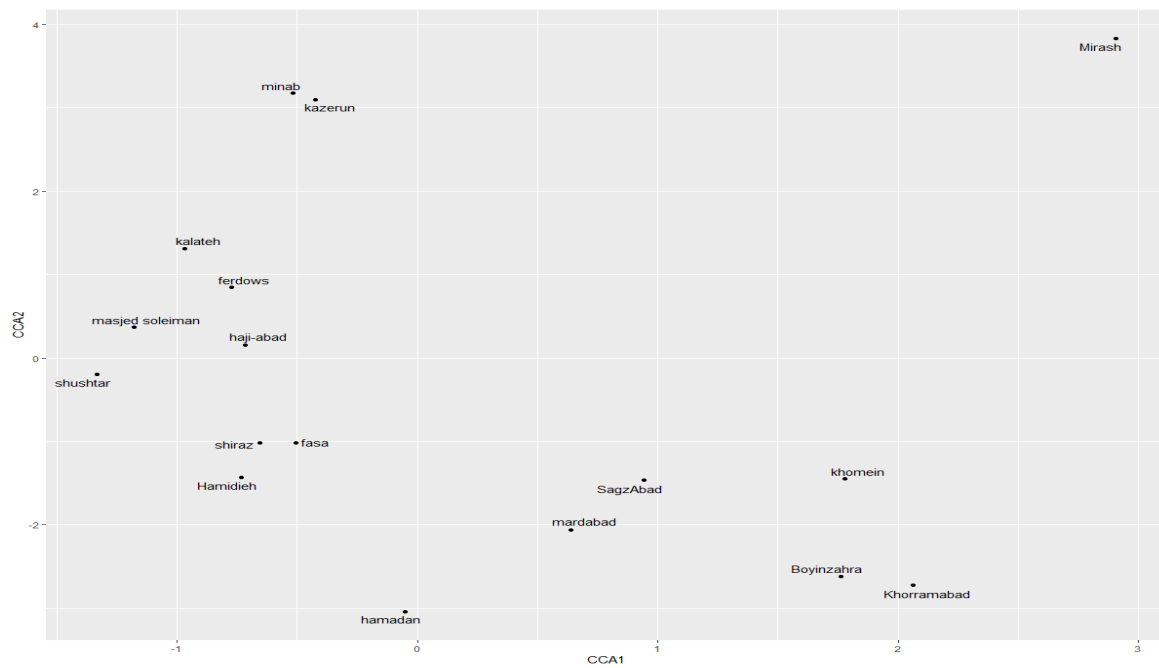

Figure S6. Scatter plot of CCA that shows the contribution of regions to each dim of CCA analysis.
